# Supplementary material for: Synthesis of Solar Light Active Reduced Graphene Oxide-ZnS Nanomaterial for Photocatalytic Degradation and Antibacterial Applications
Source: MDPI journal article supplement (doi:10.3390/mi14071324), 2023-06-28
Supplement: s1 [file s1]

**Supporting information's on**  
**Synthesis of solar light active reduced graphene oxide-ZnS nanomaterial**  
**for photocatalytic degradation and antibacterial applications**

**B. Sathya priya<sup>1</sup>, Kanakaraj Aruchamy<sup>2,\*</sup>, Tae Hwan Oh<sup>2</sup>, Balakrishna Avula<sup>3</sup>,  
Imran Hasan<sup>4</sup>, and M. Shanthi<sup>1,\*</sup>**

<sup>1</sup>Department of chemistry, Annamalai University, Annamalainagar 608 002, Tamil Nadu, India.

<sup>2</sup>School of Chemical Engineering, Yeungnam University, Gyeongsan 38436, Republic of Korea.

<sup>3</sup>Department of Chemistry, Rajeev Gandhi Memorial College of Engineering and Technology (Autonomous), Nandyal-518501, India.

<sup>4</sup>Department of Chemistry, College of Science, King Saud University, Riyadh-11451, Saudi Arabia.

\*Corresponding authors:

Prof. Dr. M. Shanthi,

Professor,

Department of chemistry, Annamalai University,

Annamalainagar 608 002,

Tamil Nadu, India

E-mail: [shanthism@gmail.com](mailto:shanthism@gmail.com) (Prof. Dr. M. Shanthi)

E-mail: [a.kanakaraj@yu.ac.kr](mailto:a.kanakaraj@yu.ac.kr) (Dr. Kanakaraj Aruchamy)

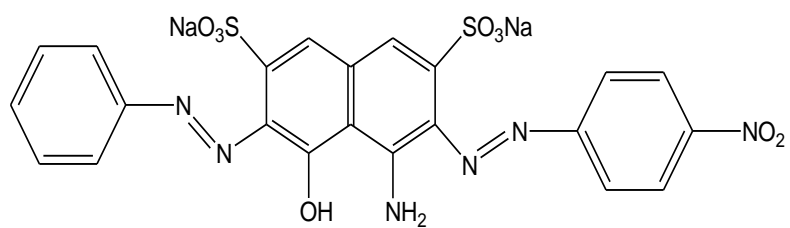

**Figure S1.** Chemical Structure of Naphthol Blue Black dye (NBB)

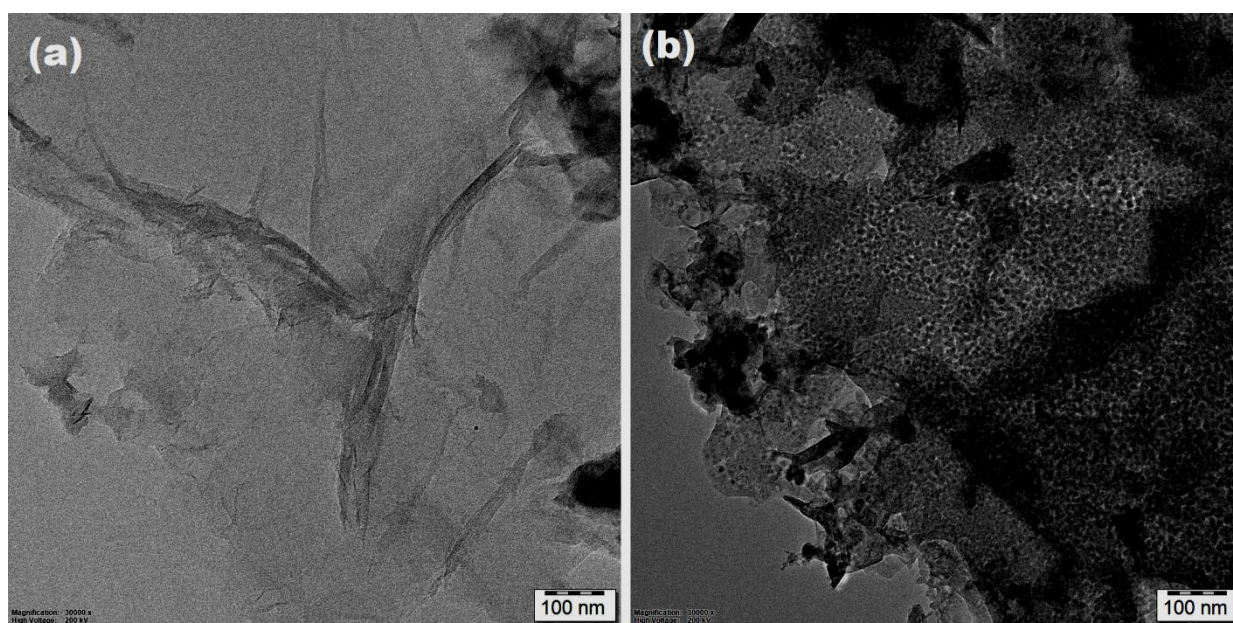

**Figure S2.** HR-TEM images of (a) rGO, (b) rGO-ZnS

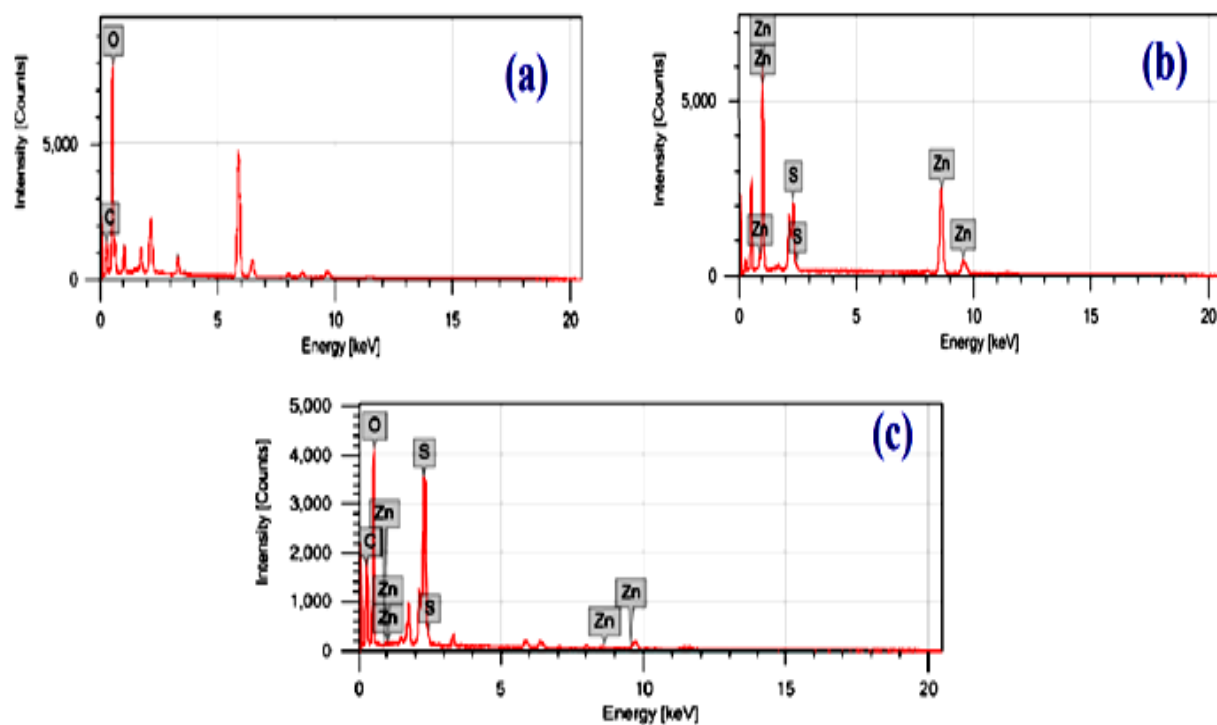

**Figure S3.** EDX spectra of (a) rGO (b) ZnS (c) rGO-ZnS

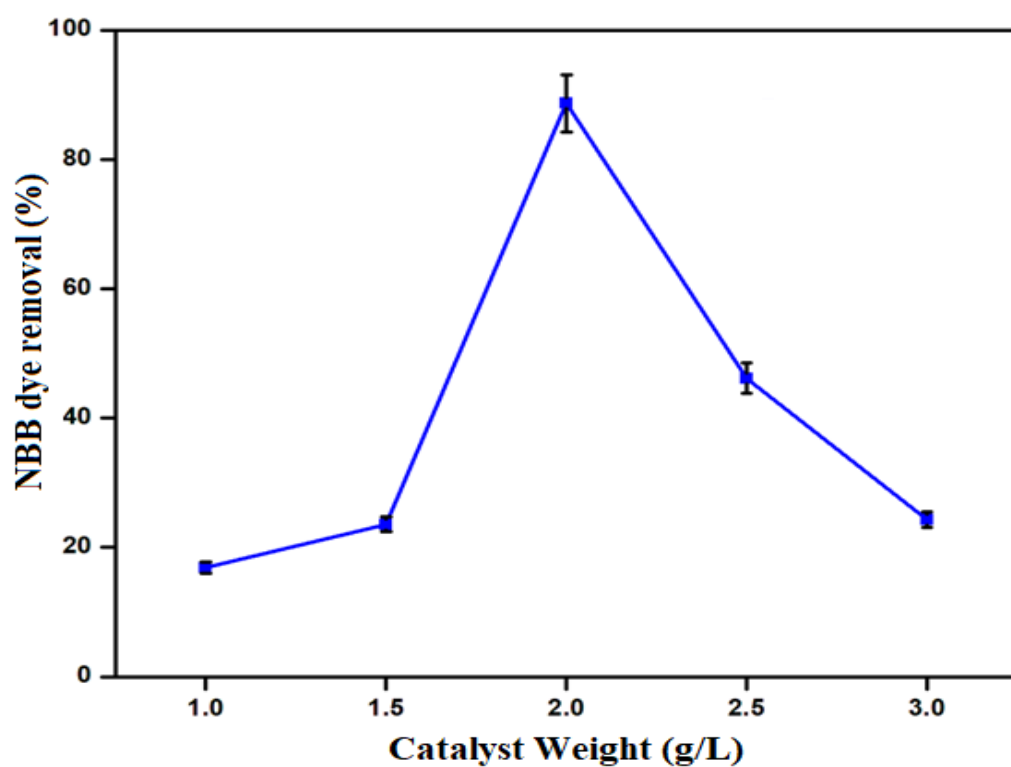

**Figure S4.** Effect of catalyst weight on the photocatalytic degradation of NBB using solar light:  $[\text{NBB}] = 2 \times 10^{-4} \text{ mol/L}$ ,  $\text{pH} = 7.0 \pm 0.1$ , airflow rate =  $8.1 \text{ mL s}^{-1}$ , irradiation time = 90 min,  $I_{\text{solar}} = 1250 \times 100 \pm 100 \text{ lux}$ .

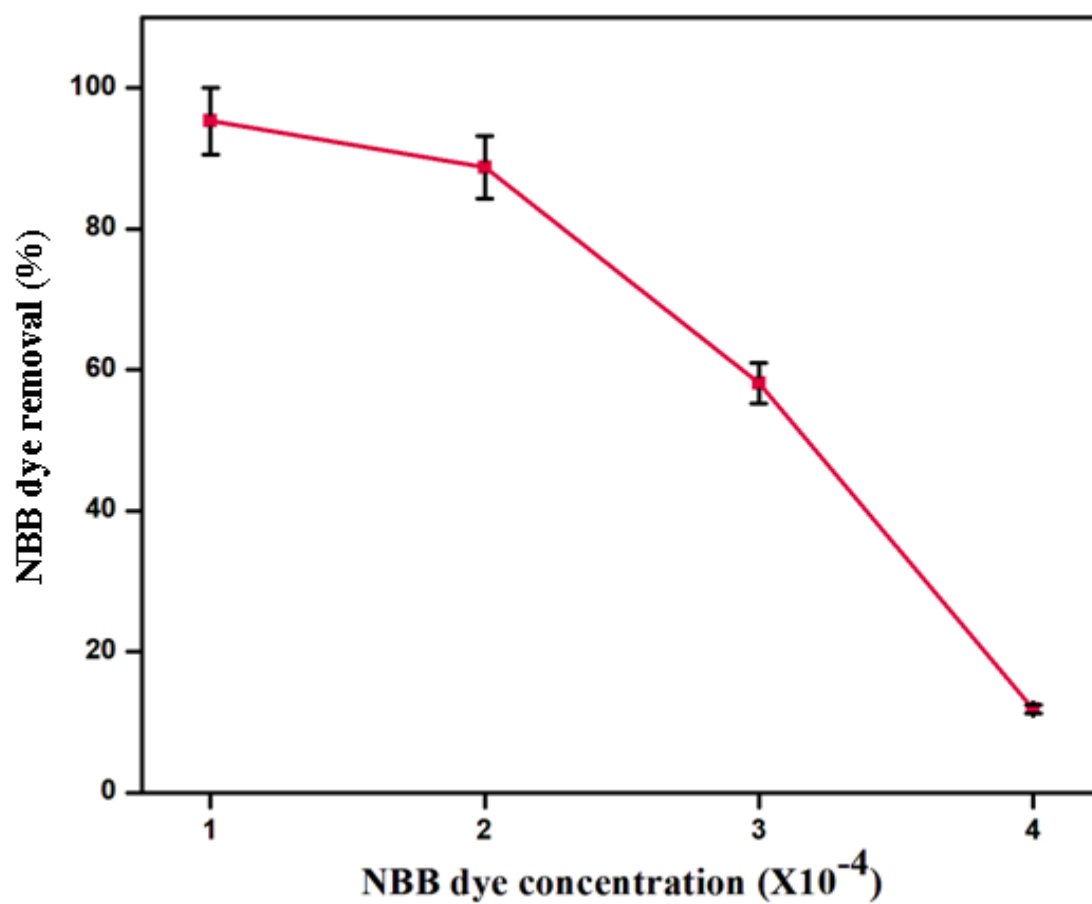

**Figure S5.** Effect of various initial dye concentrations on the degradation of NBB using solar light/rGO-ZnS nanoparticles: pH =  $7.0 \pm 0.1$ , rGO-ZnS nanoparticles = 2g/L, airflow rate =  $8.1 \text{ mL s}^{-1}$ , irradiation time = 90 min,  $I_{\text{solar}} = 1250 \times 100 \pm 100 \text{ lux}$ .

**Table S1.** Effect of different wt% of rGO on ZnS for the NBB dye degradation under solar light

| Wt% rGO | % of NBB dye degradation |
|---------|--------------------------|
| 9.3     | 74.8                     |
| 11.4    | 78.5                     |
| 13.3    | 88.7                     |
| 15.2    | 69.6                     |
| 17.0    | 53.7                     |

[NBB] =  $2 \times 10^{-4}$  mol/L, catalyst suspended = 2 g/L, pH = 7, airflow rate = 8.1 mL s<sup>-1</sup>, irradiation time = 90 min.

The photocatalytic activities of the rGO-ZnS catalysts with 9.3, 11.4, 13.3, 15.2 and 17.0 wt% of rGO loading were evaluated by the degradation of NBB under solar light and the results are given in **Table S1**. As the concentration of rGO is increased from 9.3 to 13.3 wt%, the percentage of degradation increased from 74.8 to 88.7% in NBB degradation. Catalyst loaded with 13.3 wt% of rGO shows a higher percentage of degradation. Further increase of rGO content decreases the percentage of degradation. Hence, 13.3 wt% of rGO is found to be optimum concentration of rGO in ZnS.

**Table S2.** Rate constants of photocatalytic degradation of NBB dye using solar light/rGO-ZnS nanoparticles

|   | $[NBB] \times 10^{-4} \text{ mol/L}$ | $k'(\text{min}^{-1})$ |
|---|--------------------------------------|-----------------------|
| 1 |                                      | 0.0198                |
| 2 |                                      | 0.0148                |
| 3 |                                      | 0.0101                |
| 4 |                                      | 0.0080                |

**Table S3.** Comparison of different modified ZnS towards pollutant degradation

| S.No | Catalysts                                                 | Light source                                         | Pollutants/<br>Concentration  | Catalyst amount | %Degradation/<br>time (min) | Ref.         |
|------|-----------------------------------------------------------|------------------------------------------------------|-------------------------------|-----------------|-----------------------------|--------------|
| 1    | ZnO@ZnS                                                   | 18 W- UV, 265 nm                                     | CR/40 ppm                     | 50 mg/ 100 mL   | 89/120                      | [S1]         |
| 2    | ZnS@WO <sub>3</sub> @<br>CoFe <sub>2</sub> O <sub>4</sub> | Tungsten halogen lamp (simulated sunlight), > 400 nm | MB/50 ppm                     | 50 mg/-         | 95.97/120                   | [S2]         |
| 3    | CdS/ZnS QDs                                               | Sunlight, 1048 Wm <sup>-2</sup>                      | IC/10 ppm                     | 100 mg/ 100 mL  | 87.2/360                    | [S3]         |
| 4    | Ag <sub>2</sub> WO <sub>4</sub> decorated ZnS             | 800 W halogen lamp, visible light                    | MB/10 ppm                     | 3 mg/ 20 mL     | 84/140                      | [S4]         |
| 5    | ZnS/MoS <sub>2</sub> /Bi <sub>2</sub> WO <sub>6</sub>     | 500 W Xe lamp                                        | RhB/10 ppm                    | 20 mg/ 50 mL    | 91.1/120                    | [S5]         |
| 6    | rGO-ZnS                                                   | Solar light (1250X100±100 lux)                       | NBB/(2 x 10 <sup>-4</sup> M)* | 100 mg/50 mL    | 93.7/150                    | Present work |

CR- Congo red; MB- Methylene blue; IC- Indigo carmine; RhB- Rhodamine B; NBB- Naphthol blue black; \*- concentration given in molar

## References

- [S1] Sadollahkhani, A.; Nur, O.; Willander, M.; Kazeminezhad, I.; Khranovskyy, V.; Eriksson, M.O.; Yakimova, R.; Holtz, P. O. A detailed optical investigation of ZnO@ZnS core-shell nanoparticles and their photocatalytic activity at different pH values, *Ceram. Int.* **2015**, *41*, 7174–7184
- [S2] Palanisamy, G.; Bhuvaneswari, K.; Bharathi, G.; Pazhanivel, T.; Grace, A. N.; Pasha, S.K.K. Construction of magnetically recoverable ZnS@WO<sub>3</sub>@CoFe<sub>2</sub>O<sub>4</sub> nanohybrid enriched photocatalyst for the degradation of MB dye under visible light irradiation, *Chemosphere*, **2021**, *273*, 129687.
- [S3] Janbandhu, S.Y.; Suhaila, C.T.; Munishwar, S.R.; Jayaramaiah, J.R.; Gedam, R.S. Borosilicate glasses containing CdS/ZnS QDs: A heterostructured composite with enhanced degradation of IC dye under visible-light, *Chemosphere*, **2022**, *286*, 131672.
- [S4] Kokilavani, S.; Al-Farraj, S. A.; Thomas, A. M., El-Serehy, H. A.; Raju, L. L.; Sudheer Khan, S. Enhanced visible light driven photocatalytic and antibacterial activities of Ag<sub>2</sub>WO<sub>4</sub> decorated ZnS nanocomposite, *Ceram. Int.* **2021**, *47*, 12997–13006.
- [S5] Liu, D.; Gong, J.; Sun, C.; Xu, L.; Song, Y. Enhanced photocatalytic activity for degradation of ofloxacin and dye by hierarchical flower-like ZnS/MoS<sub>2</sub>/Bi<sub>2</sub>WO<sub>6</sub> heterojunction: Synergetic effect of 2D/2D coupling interface and solid sulfide solutions, *Catal. Commun.* **2022**, *172*, 106546.
